# Supplementary material
Source: publisher site journal article supplement (https://static.cambridge.org/content/id/urn:cambridge.org:id:article:S1368980020000889/resource/name/S1368980020000889supp002.docx)
Supplement: Supplementary file 1 [file S1368980020000889supp002.docx]

| **Table S2. 6-Item Food Security Survey Module** | |
| --- | --- |
| **The next questions are about the food eaten in your family. People do different things when they are running out of money for food to make their food or their food money go further.** | |
| **Question/Statement** | **Response Options** |
| 1. In the last 12 months, did you ever cut the size of your meals or skip meals because there wasn’t enough money for food? | Yesa  No |
| 1a. [If yes] How often did this happen? Would you say … | Almost every montha Some months but not every montha  Only in 1 or 2 months |
| 2. In the last 12 months, did you ever eat less than you felt you should because there wasn’t enough money for food? | Yesa  No |
| 3. In the last 12 months, were you ever hungry but didn’t eat because you couldn’t afford enough food? | Yesa  No |
| **The next 2 statements are about food situations that families have experienced.**  **For these statements, please tell if the statement was often, sometimes, or never true for you or your family in the last 12 months.** | |
| 4. “The food that I bought just didn’t last, and I didn’t have money to get more.” | Often truea  Sometimes truea  Never true |
| 5. “I couldn’t afford to eat balanced meals.” | Often truea  Sometimes truea  Never true |

aAffirmative responses. Two or more affirmative responses indicate food insecurity.
